# Supplementary material
Source: publisher figshare collection journal article supplement (https://acs.figshare.com/ndownloader/files/17422184)
Supplement: Supplementary file 1 [file 17422184]

## Sheet: molecular formula string
Compound_ID	SMILES	Evaluation of the effects of 131 on FN level in TGFβ1-stimulated cardiac fibroblasts
		FN level (%) at 50 mM	FN level (%) at 10 mM
Nif		23.3 ± 2.5	46.3 ± 4.5
SB		12.0 ± 1.0	18.3 ± 2.5
1	O=C(O1)C2=C[C@H]1[C@H](C(C)=C)CC/C(C)=C/CC2	66.0 ± 4.3	76.1 ± 6.0
2	O=C(O1)C2=C[C@H]1[C@H](C(C)=C)CC[C@@]3(C)[C@H](O3)CC2	44.7 ± 3.3	58.1 ± 2.1
3	O=C(O1)C2=C[C@H]1[C@H](C(C)=C)CCC(C)[C@H](Br)CC2	27.3 ± 5.1	42.6 ± 7.6
4	O=C(O1)C2=C[C@H]1[C@H](C(C)=C)C/C=C(C)/[C@H](Cl)CC2	32.2 ± 3.4	47.8 ± 2.6
5	O=C(O1)C2=C[C@H]1[C@H](C(C)=C)C/C=C(C)/[C@H](F)CC2	46.6 ± 4.6	63.1 ± 5.4
6	O=C(O1)C(CC[C@H]2F)=C[C@H]1[C@H](C(C)=C)CCC2=C	43.1 ± 2.5	63.3 ± 3.3
7	O=C1C[C@H](C(OC)=O)CC/C=C(C)/CC[C@H]1C(C)=C	78.3 ± 3.0	84.7 ± 4.1
8	O=C1C[C@H](C(OCC)=O)CC/C=C(C)/CC[C@H]1C(C)=C	76.2 ± 3.3	89.5 ± 3.4
9	O=C(O1)C2=C[C@H]1[C@H](C(C)=C)C/C=C(C)\[C@@H](O)CC2	50.1 ± 6.7	64.1 ± 5.9
10	O=C(O1)C2=C[C@H]1[C@H](C(C)=C)C/C=C(C)/[C@H](O)CC2	55.0 ± 3.6	65.3 ± 2.1
11	O=C(O1)C2=C[C@H]1[C@H](C(C)=C)C/C=C(C)/C(CC2)=O	13.3 ± 4.1	26.1 ± 4.1
12	O=C(O1)C2=C[C@H]1[C@H](C(C)=C)C/C=C(C)/[C@H](OC(C3=CC=CN=C3Cl)=O)CC2	25.0 ± 2.2	44.7 ± 5.4
13	O=C(O1)C2=C[C@H]1[C@H](C(C)=C)C/C=C(C)/[C@H](OC(C3=CC=CS3)=O)CC2	43.3 ± 6.2	56.5 ± 3.1
14	O=C(C)O[C@H]1/C(C)=C/C[C@@H](C(C)=C)[C@@H]2C=C(C(O2)=O)CC1	34.1 ± 2.7	49.9 ± 2.8
15	O=C(O1)C2=C[C@H]1[C@H](C(C)=C)C/C=C(C)/[C@H](OC(C3=CC=C([N+]([O-])=O)C=C3)=O)CC2	24.2 ± 2.7	43.5 ± 3.2
16	O=C(C1=CC=C(C(F)(F)F)C=C1)O[C@H]2/C(C)=C/C[C@@H](C(C)=C)[C@@H]3C=C(C(O3)=O)CC2	34.1 ± 4.2	49.8 ± 7.3
17	O=C(C1=CC(C(F)(F)F)=CC(C(F)(F)F)=C1)O[C@H]2/C(C)=C/C[C@@H](C(C)=C)[C@@H]3C=C(C(O3)=O)CC2	39.1 ± 4.1	51.3 ± 2.1
18	O=C(O1)C2=C[C@H]1[C@H](C(C)=C)C/C=C(C)/C(CC2)=N/OC(C)=O	76.6 ± 2.7	89.7 ± 3.9
19	O=C(O1)C2=C[C@H]1[C@H](C(C)=C)C/C=C(C)/C(CC2)=N/OC(C3=CC=CO3)=O	78.8 ± 4.2	86.1 ± 4.1
20	O=C(O1)C2=C[C@H]1[C@H](C(C)=C)C[C@@H](O)/C(C)=C/CC2	27.2 ± 2.9	44.6 ± 4.1
21	O=C(O1)C2=C[C@H]1[C@H](C(C)=C)C[C@@H](OC)/C(C)=C/CC2	62.6 ± 3.5	73.9 ± 4.3
22	O=C(O1)C2=C[C@H]1[C@H](C(C)=C)C[C@@H](OCC)/C(C)=C/CC2	62.1 ± 2.6	72.8 ± 3.9
23	O=C(O1)C2=C[C@H]1[C@H](C(C)=C)C[C@@H](OC(C)C)/C(C)=C/CC2	62.5 ± 4.6	74.4 ± 1.3
24	O=C(O1)C2=C[C@H]1[C@H](C(C)=C)C[C@@H](OC([H])=O)/C(C)=C/CC2	68.3 ± 3.3	75.5 ± 3.9
25	O=C(O1)C2=C[C@H]1[C@H](C(C)=C)C[C@@H](N3CCCCC3)/C(C)=C/CC2	62.2 ± 6.7	77.8 ± 2.1
26	O=C(O1)C2=C[C@H]1[C@H](C(C)=C)C[C@@H](N3CCCC3)/C(C)=C/CC2	61.1 ± 4.2	74.5 ± 5.6
27	O=C(O1)C2=C[C@H]1[C@H](C(C)=C)C[C@@H](N3CCOCC3)/C(C)=C/CC2	57.6 ± 6.0	71.1 ± 9.7
28	O=C(O1)C2=C[C@H]1[C@H](C(C)=C)C[C@H](N=[N+]=[N-])/C(C)=C/CC2	26.9 ± 2.9	61.6 ± 5.8
29	O=C(O1)C2=C[C@H]1[C@H](C(C)=C)C[C@H](O[N+]([O-])=O)/C(C)=C/CC2	56.6 ± 5.2	62.5 ± 8.0
30	O=C(O1)C2=C[C@H]1[C@H](C(C)=C)C[C@H](OC)/C(C)=C/CC2	59.7 ± 2.9	68.6 ± 4.6
31	O=C(O1)C2=C[C@H]1[C@H](C(C)=C)C[C@H](OCC)/C(C)=C/CC2	59.1 ± 2.5	71.1 ± 6.7
